# Supplementary material for: The transcription factor Zeb2 regulates development of conventional and plasmacytoid DCs by repressing Id2
Source: PubMed Central journal article supplement — J Exp Med. 2016 May 30;213(6):897–911. doi: 10.1084/jem.20151715 (PMC4886362; doi:10.1084/jem.20151715), 2016-05-30
Supplement: supp_jem.20151715_JEM_20151715_sm.pdf [file supp_jem.20151715_JEM_20151715_sm.pdf]

SUPPLEMENTAL MATERIAL

Scott et al., <http://www.jem.org/cgi/content/full/jem.20151715/DC1>

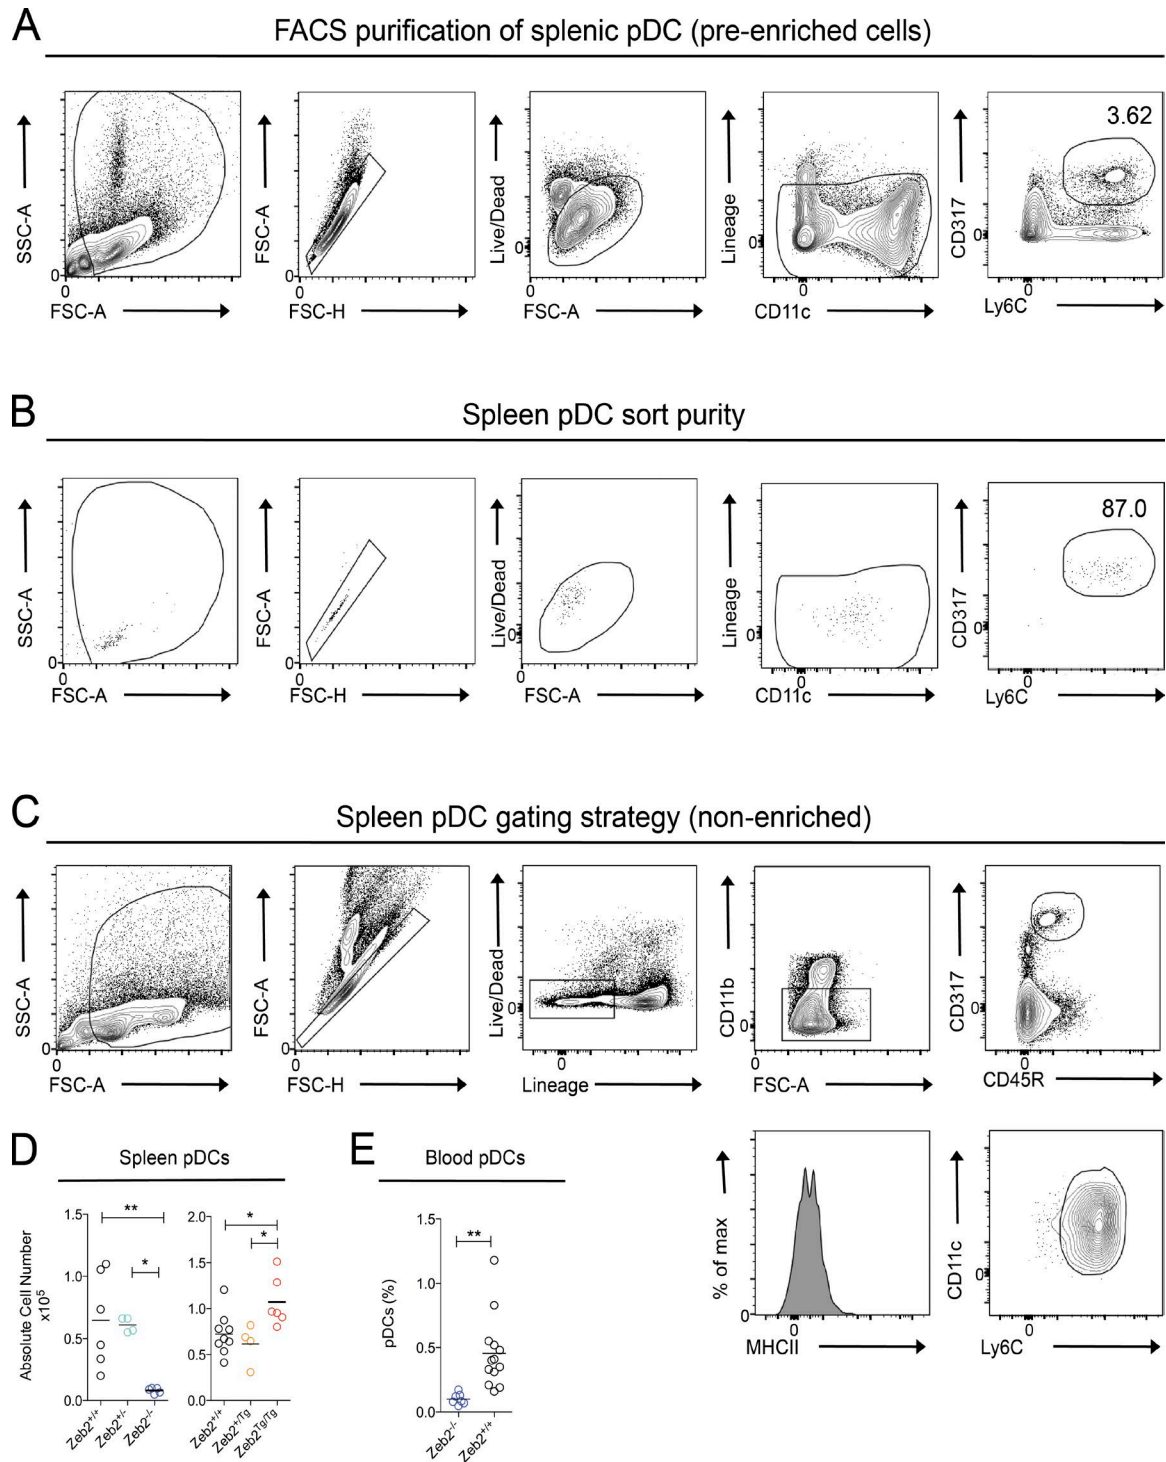

Figure S1. **Splenic pDCs.** (A) Representative FACS plots showing strategy for purification of splenic pDCs. The number represents the proportion of pDCs as a percentage of total cells. Samples were preenriched using streptavidin negative selection beads (Magnisort; eBioscience). (B) Representative FACS plots showing purity of splenic pDCs after sorting. The number represents the proportion of pDCs as a percentage of total cells. (C) Representative FACS plots showing gating strategy and CD11c, Ly6C, and MHCII expression for pDCs in a nonenriched spleen. (D) Absolute cell number of pDCs in the spleen of *Zeb2*<sup>+/+</sup>, *Zeb2*<sup>+/-</sup>, *Zeb2*<sup>-/-</sup>, *Zeb2*<sup>+Tg</sup>, and *Zeb2*<sup>Tg/Tg</sup> mice. Data are representative of at least two experiments where each dot represents one mouse. One-way ANOVA with Bonferroni posttest was used. (E) Proportion of pDCs in the blood of *Zeb2*<sup>+/+</sup> and *Zeb2*<sup>-/-</sup> mice. Data are pooled from two experiments where each dot represents one mouse. Two-way Student's *t* test was used. \*, *P* < 0.05; \*\*, *P* < 0.01. FSC, forward scatter. SSC, side scatter.

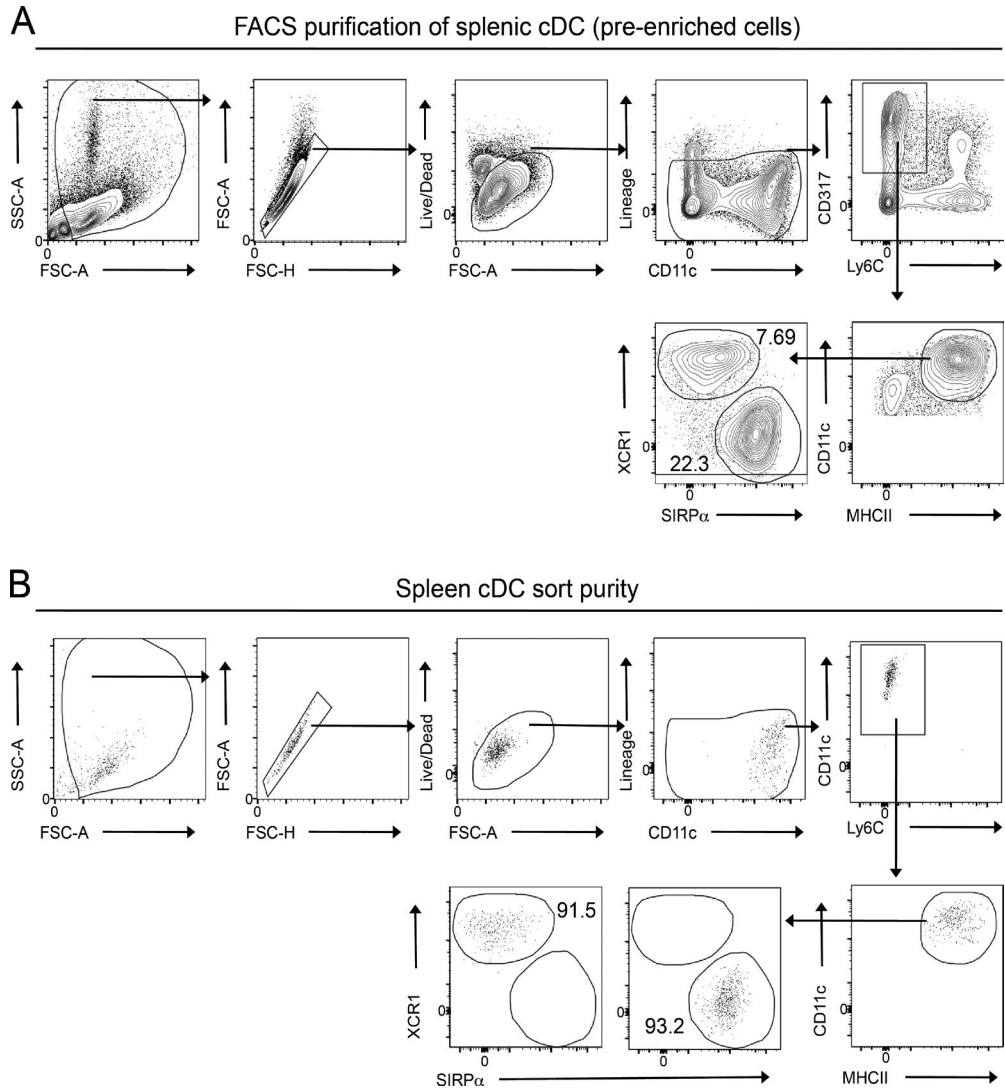

Figure S2. **Splenic cDC sorting strategy and purities.** (A) Representative FACS plots showing strategy for purification of splenic cDC subsets. The numbers represent the proportion of each cDC subset as a percentage of total cells. Samples were preenriched using streptavidin negative selection beads (Magnisort; eBioscience). (B) Representative FACS plots showing purity of splenic cDC subsets after sorting. The numbers represent the proportion of each cDC subset as a percentage of total cells. FSC, forward scatter. SSC, side scatter.

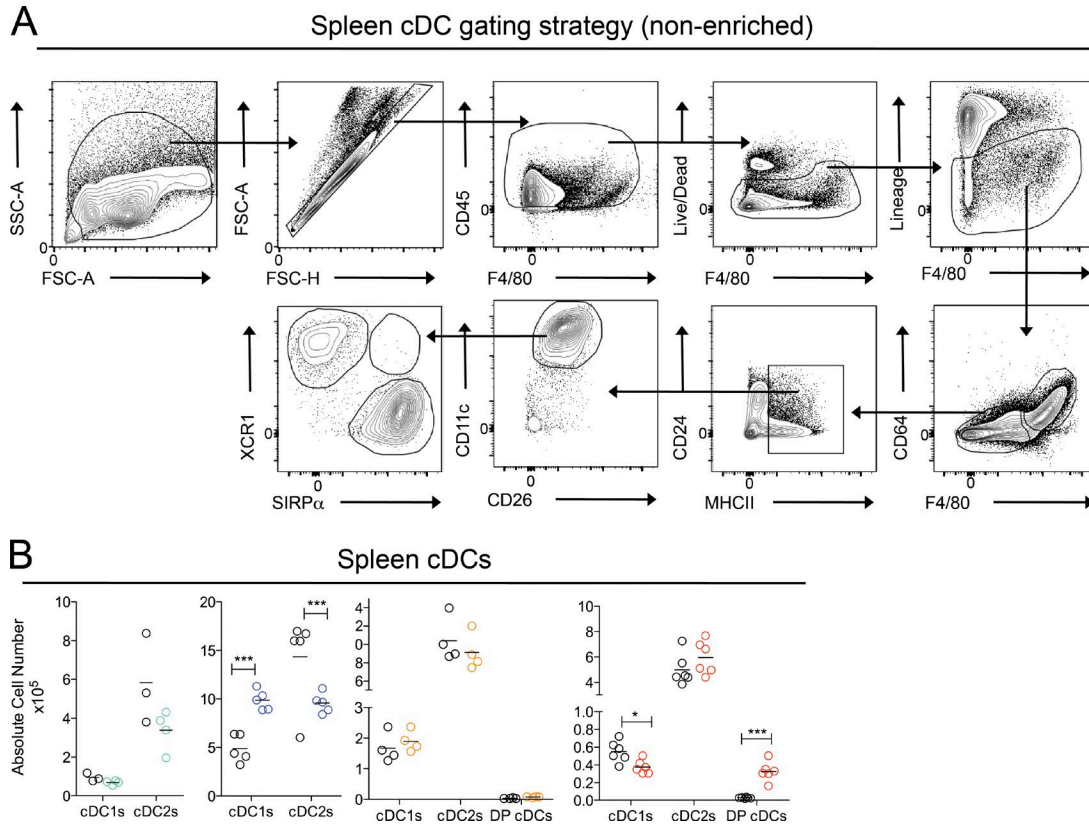

Figure S3. **Splenic cDC gating strategy and absolute numbers.** (A) Representative FACS plots showing gating strategy for cDC1s, cDC2s, and DP cDCs in a nonenriched spleen. This gating strategy was also used for lung, liver, and SI LP. FSC, forward scatter. SSC, side scatter. (B) Absolute cell number of cDC1s, cDC2s, and DP cDCs in the spleen of *Zeb2*<sup>+/+</sup>, *Zeb2*<sup>+/-</sup>, *Zeb2*<sup>-/-</sup>, *Zeb2*<sup>+Tg</sup>, and *Zeb2*<sup>Tg/Tg</sup> mice. Data are representative of at least two experiments where each dot represents one mouse. \*,  $P < 0.05$ ; \*\*\*,  $P < 0.001$ . One-way ANOVA with Bonferroni posttest was used.

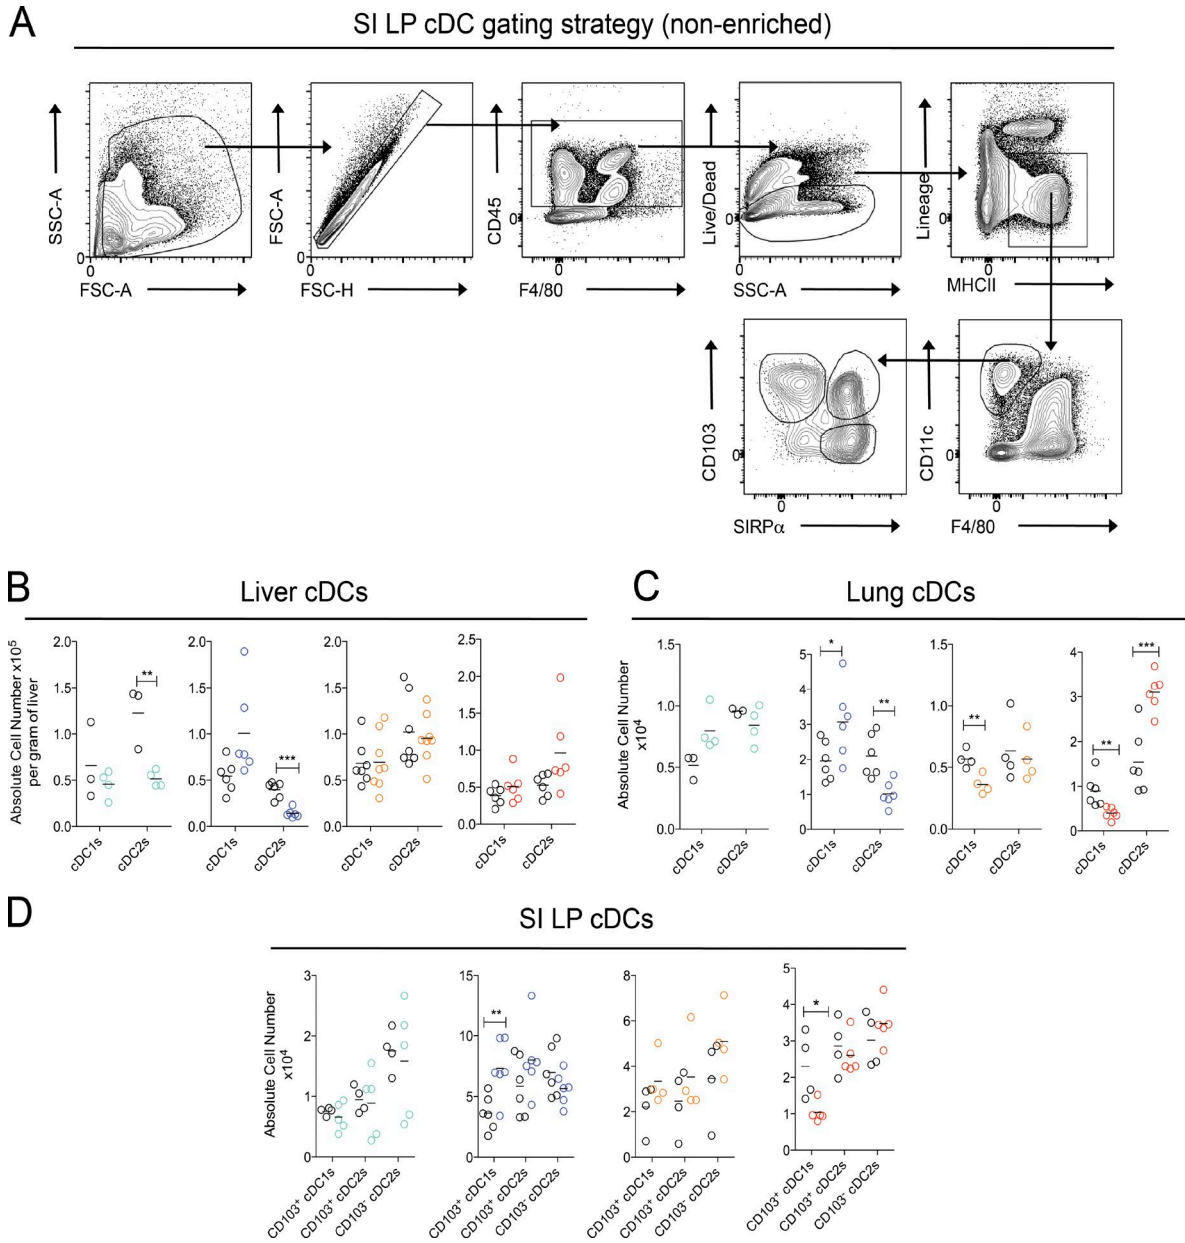

Figure S4. **cDCs in other tissues.** (A) Representative FACS plots showing gating strategy for CD103<sup>+</sup> cDC1s, CD103<sup>+</sup> cDC2s, and CD103<sup>-</sup> cDC2s in the SI LP. FSC, forward scatter. SSC, side scatter. (B–D) Absolute cell number of cDC1s and cDC2s in liver (B), lung (C), and SI LP (D) of *Zeb2*<sup>+/+</sup>, *Zeb2*<sup>+/-</sup>, *Zeb2*<sup>-/-</sup>, *Zeb2*<sup>Tg/Tg</sup>, and *Zeb2*<sup>Tg/Tg</sup> mice. Data are representative of two experiments where one dot represents one mouse. \*, *P* < 0.05; \*\*, *P* < 0.01; \*\*\*, *P* < 0.001. One-way ANOVA with Bonferroni posttest was used.

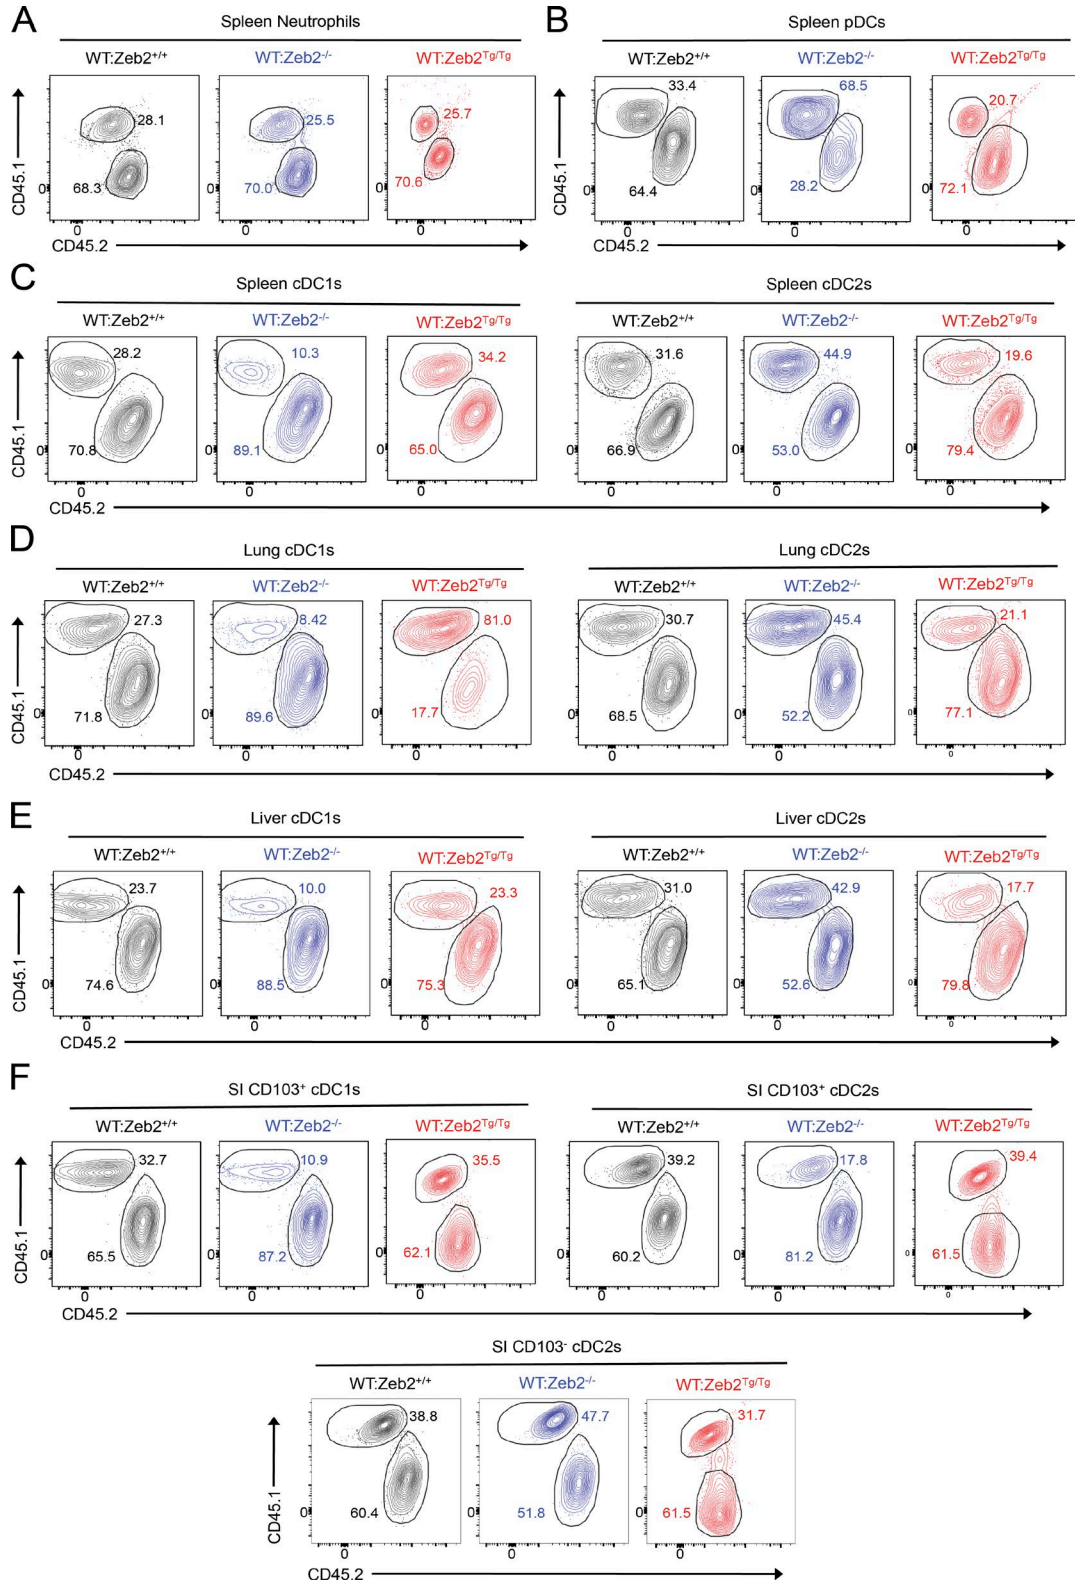

Figure S5. **BM chimeras.** (A–F) Representative FACS plots showing CD45.1 and CD45.2 staining among splenic neutrophils (A), splenic pDCs (B), splenic cDC1s and cDC2s (C), lung cDC1s and cDC2s (D), liver cDC1s and cDC2s (E), and SI LP CD103<sup>+</sup> cDC1s, CD103<sup>+</sup> cDC2s, and CD103<sup>-</sup> cDC2s (F) in WT:Zeb2<sup>+/+</sup>, WT:Zeb2<sup>-/-</sup>, and WT:Zeb2<sup>Tg/Tg</sup> chimera. The numbers represent the proportion of each cell type coming from CD45.1 or CD45.2 BM.

BM/Spleen pre-cDC gating strategy

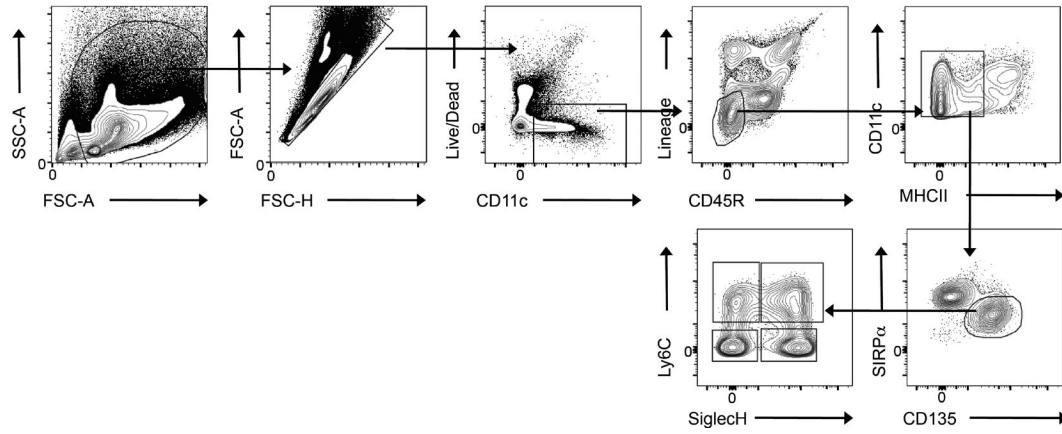

Figure S6. **Pre-cDC gating strategy.** Representative FACS plots showing the gating strategy used to identify pre-cDC subsets in the BM and spleen. Plots shown are from BM. FSC, forward scatter. SSC, side scatter.

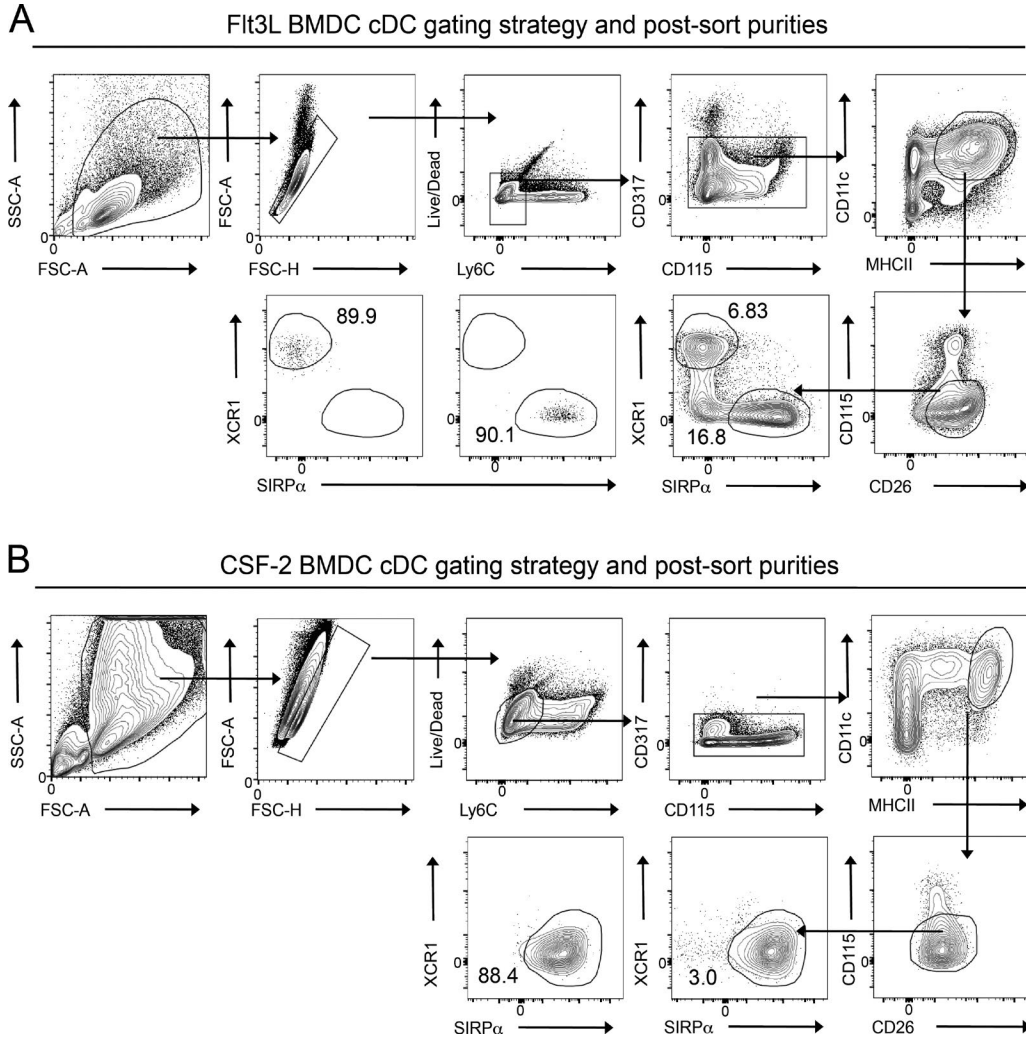

Figure S7. **BMDC gating strategies and sort purities.** (A and B) Representative FACS plots showing gating strategy and postsort purities for WT Flt3L BMDC cultures (A) and WT CSF-2 BMDC cultures (B). The numbers represent the proportion of indicated cells as a percentage of total cells. FSC, forward scatter. SSC, side scatter.



A

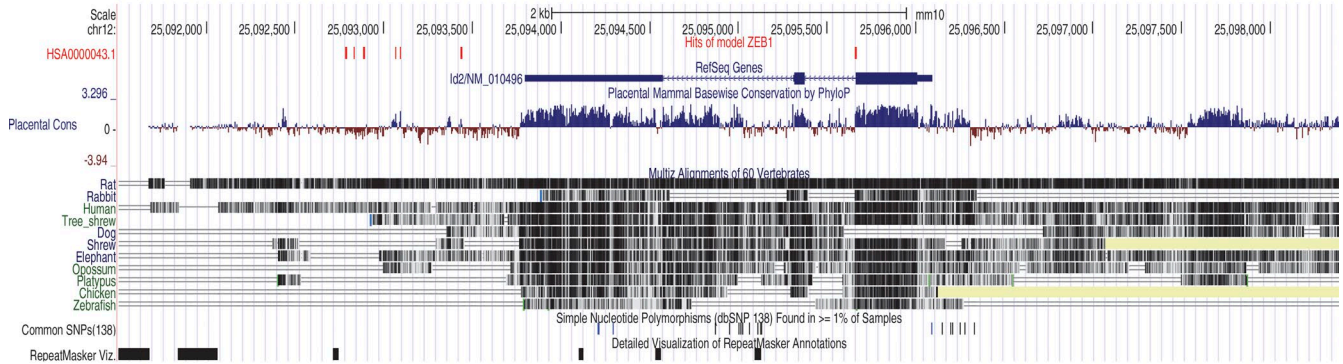

B

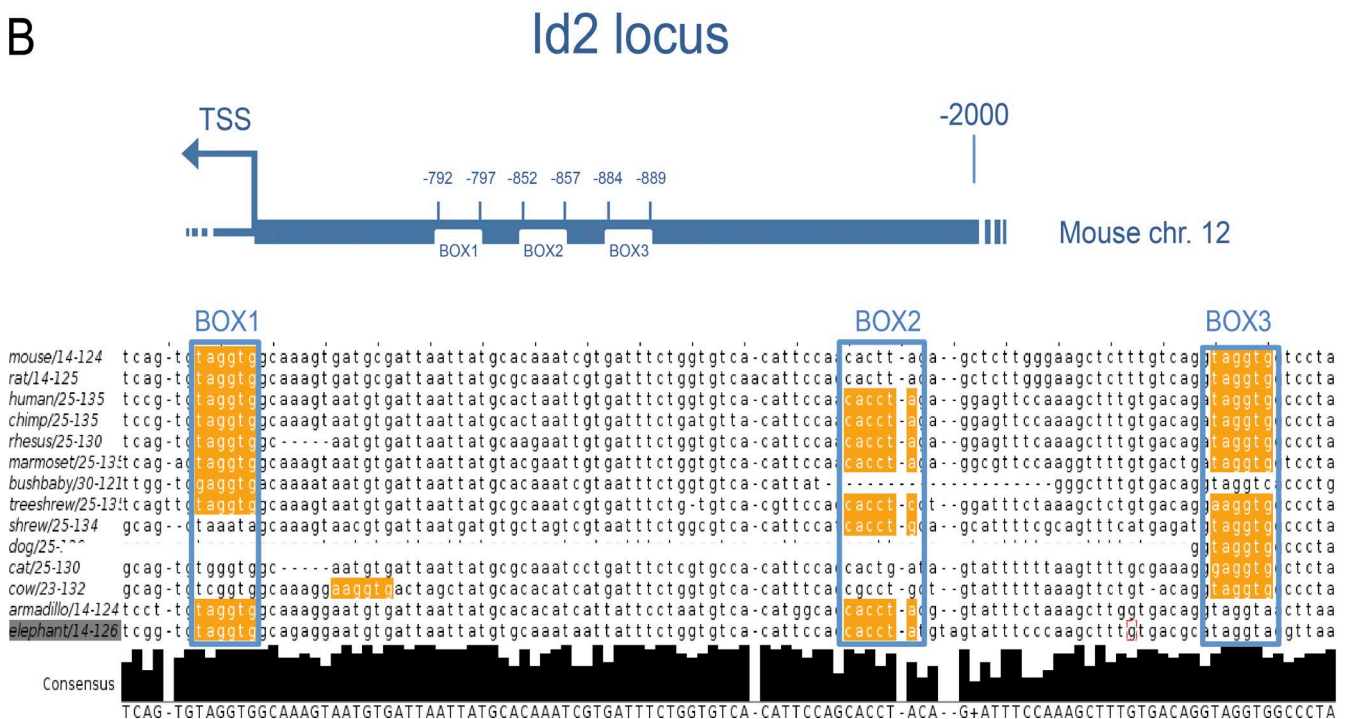

Figure S8. **Predicted Zeb binding sites in Id2 locus.** (A) Physbinder predictions for Zeb1 binding sites in Id2 locus and surrounding regions. Zeb1 was used as a model for Zeb2, as the sequencing binding motifs are conserved between them. The red lines indicate predicted Zeb binding sites. Sequence conservation among other species is also depicted. (B) The top shows a schematic representation of the Id2 promoter region and ConTra-predicted Zeb E box binding sites. The bottom shows sequence conservation of these E boxes across multiple species. TSS, transcription start site. chr., chromosome.

Table S1. Differentially expressed genes: Zeb2<sup>+/-</sup> versus Zeb2<sup>Tg/Tg</sup> cDC1s

| Up-regulated  |         |               | Down-regulated |               |           |
|---------------|---------|---------------|----------------|---------------|-----------|
| Tgm2          | Hcar2   | Tgfb1         | Cd38           | Card10        | Slamf6    |
| Clec4a1       | Cd302   | Ccnb1         | Gpr82          | Ildr1         | Cystm1    |
| Clec7a        | Lifr    | Neur12        | Pkib           | Efcc1         | Marveld2  |
| Clec1b        | Ifi203  | Sh2d1b1       | Ccl22          | Fas           | Homer2    |
| Sirpb1a       | Ms4a7   | Acp5          | Ido1           | Cd8b1         | Gclc      |
| Cd4           | Fam26f  | Oas2          | Fchsd2         | Otud7b        | Cxcr3     |
| Adgre1        | Hmox1   | Esr1          | Cnnm1          | Lpar3         | Cyb561    |
| Oasl2         | Slc16a7 | Aurkb         | Fcrlb          | Gramd2        | Cdon      |
| Tlr1          | Mndal   | Cdc25c        | Angel1         | Elmo3         | Esyt3     |
| Wfdc17        | Rarg    | Aurka         | Gice           | Asap2         | Mmp28     |
| Clec4a2       | Cdc25b  | Ehf           | Sspo           | Slc41a2       | Notch4    |
| Ifit3         | Tespa1  | Il1rn         | Pik3r3         | Mab21l3       | Trabd2b   |
| Oas1a         | Ctnnd2  | Ttk           | Sec1           | Casr          | Aff3      |
| Zeb2          | Fam46a  | Ckap2l        | Slc22a15       | Scin          | Lsr       |
| Apobec1       | Ccl9    | Pou2f2        | Vps37d         | Cd8a          | P3h2      |
| Pilrb1        | Emb     | A630033H20Rik | Nfe2l3         | Pdzk1ip1      | Nid2      |
| Ifit3b        | Pira2   | A1504432      | Lzts2          | Lrrc1         | Egfl8     |
| Clec4a4       | Gapt    | Cenpf         | Mtmr4          | Myb           | Proser2   |
| Sirpa         | Slc40a1 | Cenpi         | Lrrc29         | Abcd2         | Serpinp6b |
| Lair1         | Lst1    | Ifi27l2a      | Pacsin1        | Pcdh1         | Rtn4r1    |
| Cybb          | Tlr7    | Gngt2         | Tm4sf5         | Cldn1         | Actn1     |
| Fcer1g        | Gpr141  | Cenpm         | Arc            | Hgfac         | Gcsam     |
| Ms4a4c        | Hpgds   | Vegfa         | Noxred1        | Adgrf5        | Dkk3      |
| Cd300ld       | Ifitm3  | Lag3          | Prr13          | Ldlrad3       | Gm3336    |
| Csf1r         | Fut7    | Ctsc          | Serpinp1a      | Gpr157        | Ltbp2     |
| Itgam         | S100a4  | Casp1         | Pdcd1          | Foxj1         | Fcrla     |
| Ddx58         | Abhd15  | Spic          | Dnajc22        | Ccr9          | Ttc39a    |
| 1810011H11Rik | Hacd4   | Spc25         | Chst11         | Rab30         |           |
| Gpr162        | Ceacam1 |               | Ms4a1          | Ankrd55       |           |
| Cd300a        | Ms4a6b  |               | Anxa6          | Fndc4         |           |
| Gm12250       | Cdr2    |               | Cndbp1         | Arpin         |           |
| Nxpe4         | Lgmn    |               | Sh3gl3         | Mpzl2         |           |
| Ncf2          | Ube2c   |               | Chrb1          | Frmf5         |           |
| Ltb4r1        | Cd101   |               | Tlr3           | Ptgis         |           |
| Cd300lf       | Ccl6    |               | Col27a1        | Prss57        |           |
| Pydc4         | Ccnf    |               | Rasip1         | Itga3         |           |
| Abi3          | Sapcd2  |               | Cd200          | Gpr33         |           |
| Rtp4          | Ggt5    |               | Mrv1           | Traf4         |           |
| Clec4n        | Prc1    |               | Pglyrp1        | Sema4c        |           |
| Galnt6        | Itga9   |               | Acss2          | Ffar4         |           |
| Sirpb1b       | Gm5150  |               | Myzap          | Serpine2      |           |
| Pilrb2        | Prdm1   |               | Ctla4          | Inadl         |           |
| Ms4a6c        | Ear2    |               | Sema4f         | Pcsk5         |           |
| Plcb1         | Klk8    |               | Spint2         | D030025P21Rik |           |
| Oas3          | C3ar1   |               | Dapk2          | 2510009E07Rik |           |
| Ifit1         | Ifi47   |               | Gucy2c         | E330020D12Rik |           |
| Gm9733        | Itgad   |               | Prph           | Dcstamp       |           |
| Slc7a11       | Rasgrf2 |               | Kazn           | Hepacam2      |           |
| Fcgr4         | Lpcat2  |               | Dusp18         | Arhgef9       |           |
| Ifit1bl1      | Oas1g   |               | Snn            | Lefty1        |           |
| Pla2g7        | Xaf1    |               | Sept1          | Serpinp9      |           |
| Ddit4         | Pif1    |               | Mmp19          | Clec4b2       |           |

Table S2. Differentially expressed genes: Zeb2<sup>+/+</sup> versus Zeb2<sup>-/-</sup> cDC2s

|               | Up-regulated  |         | Down-regulated |
|---------------|---------------|---------|----------------|
| Picb1         | Lima1         | F11r    | Ceacam19       |
| 1700011B04Rik | Nid1          | Nrg2    | P2ry2          |
| Picb4         | Pbx1          | Wfdc21  | Chtf18         |
| Itgad         | Tgtp1         | Stard10 | Cp             |
| Cox6a2        | Epcam         | Ttll5   | Ska1           |
| Ttc39a        | Tenm4         | Cd101   | Fam198b        |
| Sspo          | Fcrla         | Aff3    | Myof           |
| Upp1          | E330020D12Rik | Pappa2  | Slc1a2         |
| Chac1         | Osgin1        | Gm3336  | 2610528A11Rik  |
| Cxcr3         | Dact3         | Cst3    | Cd209b         |
| Lurap1        | Snx22         | Prg3    | Dbn1           |
| Cdh17         | Arpin         | Car2    | Kntc1          |
| Lsr           | Zcchc18       | Sema4c  | BC030867       |
| Cd84          | Snn           | Gjb2    | Slc9a2         |
| Fcer2a        | Sox8          | G0s2    | Clec9a         |
| Prg2          | Cystm1        | Elovl7  | Lyz2           |
| Ecel1         | Jag1          | Oasl1   | Smim5          |
| Pde1b         | Apoe          | Utf1    | Dmwd           |
| Slc22a23      | Paqr9         | Strip2  | Cygb           |
| Cysl1r1       | Gpr55         | Gpr160  | Mmp9           |
| Frk           | Efnb1         | Clec4b2 | Dapk1          |
| Cldn1         | Gpr157        | S1fn1   | Gpr83          |
| Tmeff1        | Elmo3         | Cd69    | Ccr2           |
| Hdc           | Oasl2         | Nid2    | Hr             |
| Siglecf       | Mnda          | C3ar1   | Dab2           |
| Rtn4r1        | Hepacam2      | Krtcap3 | Lyz1           |
| Rnase4        | Als2cr12      | Ackr3   | Zeb2           |
| Gpc1          | Ccl24         | Cx3cl1  | Cx3cr1         |
| Dusp4         | Tm4sf5        | Rragd   | Gp2            |
| Ms4a1         | Slc27a2       |         |                |

Table S3. Antibodies used for flow cytometry

| Antibody | Clone       |
|----------|-------------|
| Fc Block | 2.4G2       |
| CCR2     | 475301      |
| CD3e     | 145-2c11    |
| CD4      | RM4-5       |
| CD8      | 53-6.7      |
| CD19     | 1D3         |
| CD24     | M1/69       |
| CD26     | H194-112    |
| CD38     | 90          |
| CD45     | 30-F11      |
| CD45.1   | A20         |
| CD45.2   | 104         |
| CD45R    | RA3-6B2     |
| CD64     | X54-5/7.1   |
| CD69     | H1.2F3      |
| CD101    | Moushi101   |
| CD103    | 2E7         |
| CD115    | AFS98       |
| CD117    | 2B8         |
| CD11b    | M1/70       |
| CD11c    | N418        |
| CD127    | SB/199      |
| CD135    | A2F10       |
| CD161    | PK136       |
| CD172a   | P84         |
| CD317    | 120g8       |
| CX3CR1   | SA011F11    |
| EpCam    | G8.8        |
| F4/80    | BM8         |
| IA-IE    | M5/114.15.2 |
| IRF4     | M-17        |
| IRF8     | V3GYWCH     |
| Ly6C     | AL-21       |
| Sca1     | D7          |
| SiglecF  | E50-2440    |
| SiglecH  | 440c        |
| Ter-119  | Ter-119     |
| XCR1     | ZET         |

Table S4. Primers for RT-qPCR

| Gene          | Forward primer                | Reverse primer                 |
|---------------|-------------------------------|--------------------------------|
| <i>GAPDH</i>  | 5'-GCATGGCCTTCCGTGTTTC-3'     | 5'-TGTCATCATACTTGGCAGGTTTCT-3' |
| <i>Zeb2</i>   | 5'-GGCAAGGCCTTCAAGTACAA-3'    | 5'-AAGCGTTTCTTGCAGTTTGG-3'     |
| <i>Id2</i>    | 5'-TCCTGTCTTGCAGGCATCTGAAT-3' | 5'-AACGTGTTCTCCTGGTAAATGGC-3'  |
| <i>Batf3</i>  | 5'-CAGACCCAGAAGGCTGACAAG-3'   | 5'-CTGCCGACACAGAGTTCTC-3'      |
| <i>Nfil3</i>  | 5'-GAACTCTGCCTTAGCTGAGGT-3'   | 5'-ATTCCCCTTTTCTCCGACACG-3'    |
| <i>Klf4</i>   | 5'-CGATGAACTGACCAAGGCACTAC-3' | 5'-CCTCTTCATGTGTAAGGCAAGGTG-3' |
| <i>Notch2</i> | 5'-CCACCTGCCTGGATAAGATCG-3'   | 5'-CTGCCCGTTGTTCCACACAC-3'     |
| <i>RelB</i>   | 5'-GAATGTCGTGAGGATCTGC-3'     | 5'-TGGTGGACTTCTTGTCGTAG-3'     |
| <i>E2-2</i>   | 5'-CGAAAAGTTCCTCCGGGTTTG-3'   | 5'-CGTAGCCGGGCTGATTCAT-3'      |
